# Supplementary material for: Care of rheumatology patients during the lockdown in early 2020: Telemedicine, delegation, patient satisfaction and vaccination behavior
Source: Z Rheumatol. 2021 May 11;81(2):157–63. [Article in German] doi: 10.1007/s00393-021-01005-3 (PMC8111653; doi:10.1007/s00393-021-01005-3)
Supplement: Supplementary file 1 [file 393_2021_1005_MOESM1_ESM.pdf]

|                                                                                                                                      | trifft<br>nicht zu | trifft<br>teils zu | trifft zu | trifft<br>sehr zu | trifft<br>ganz<br>genau<br>zu |
|--------------------------------------------------------------------------------------------------------------------------------------|--------------------|--------------------|-----------|-------------------|-------------------------------|
| 1. Der/Die Anrufer*in schien ein echtes Interesse an meinen Problemen zu haben.                                                      | 1                  | 2                  | 3         | 4                 | 5                             |
| 2. Der/Die Anrufer*in hat mich ausführlich über die vorhandenen Behandlungsmöglichkeiten informiert.                                 | 1                  | 2                  | 3         | 4                 | 5                             |
| 3. Ich hatte das Gefühl, dass ich dem/der Anrufer*in auch sehr persönliche Probleme hätte anvertrauen können.                        | 1                  | 2                  | 3         | 4                 | 5                             |
| 4. Der/Die Anrufer*in hat alle Behandlungsmaßnahmen gemeinsam mit mir festgelegt.                                                    | 1                  | 2                  | 3         | 4                 | 5                             |
| 5. Die Erklärungen der/der Anrufer*in waren für mich sehr verständlich.                                                              | 1                  | 2                  | 3         | 4                 | 5                             |
| 6. Der/Die Anrufer*in hat sich genügend Zeit für mich genommen.                                                                      | 1                  | 2                  | 3         | 4                 | 5                             |
| 7. Der/Die Anrufer*in hat mit mir ausführlich über die Risiken und Nebenwirkungen der Behandlung gesprochen (falls Therapiewechsel). | 1                  | 2                  | 3         | 4                 | 5                             |
| 8. Meine Probleme und Nöte wurden von dem/der Anrufer*in verstanden und ernst genommen.                                              | 1                  | 2                  | 3         | 4                 | 5                             |
| 9. Der/Die Anrufer*in hat das Möglichste getan, um mich zu beruhigen.                                                                | 1                  | 2                  | 3         | 4                 | 5                             |
| 10. Der/Die Anrufer*in hat sich nach den Auswirkungen der Erkrankung auf meinen Alltag erkundigt.                                    | 1                  | 2                  | 3         | 4                 | 5                             |
| 11. Der/Die Anrufer*in gab mir genügend Möglichkeiten, meine Schwierigkeiten und Probleme zu schildern.                              | 1                  | 2                  | 3         | 4                 | 5                             |
| 12. Der/Die Anrufer*in respektiert es, wenn ich eine abweichende Meinung zur Behandlung habe.                                        | 1                  | 2                  | 3         | 4                 | 5                             |
| 13. Der/Die Anrufer*in hat mich ausführlich über meine aktuellen Beschwerden befragt.                                                | 1                  | 2                  | 3         | 4                 | 5                             |
